# Supplementary material for: Enhanced Pseudocapacitive Performance of Symmetric Polypyrrole-MnO2 Electrode and Polymer Gel Electrolyte
Source: MDPI journal article supplement (doi:10.3390/polym13203577), 2021-10-16
Supplement: s1 [file s1]

# Supplementary Materials

## **Enhanced Pseudocapacitive Performance of Symmetric Polypyrrole-MnO<sub>2</sub> Electrode and Polymer Gel Electrolyte**

Wen-Jun Zhuo<sup>1</sup>, Yen-Hua Wang<sup>1</sup>, Chia-Tse Huang<sup>1</sup>, Ming-Jay Deng<sup>1\*</sup>

Department of Applied Chemistry, Providence University, Taichung 43301, Taiwan

\* Correspondence: dengmj1020@pu.edu.tw (M.J. Deng)

<sup>1</sup> These authors contributed equally to this work.

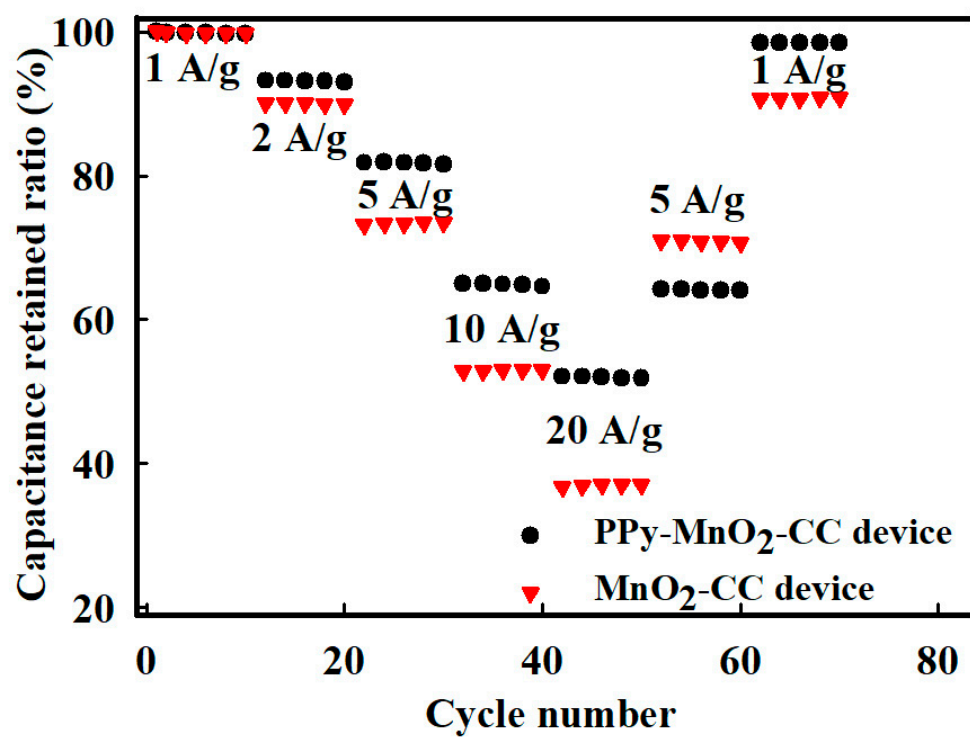

Figure S1 Rate performance tests of the PPy-MnO<sub>2</sub>-CC and MnO<sub>2</sub>-CC flexible SSC devices.

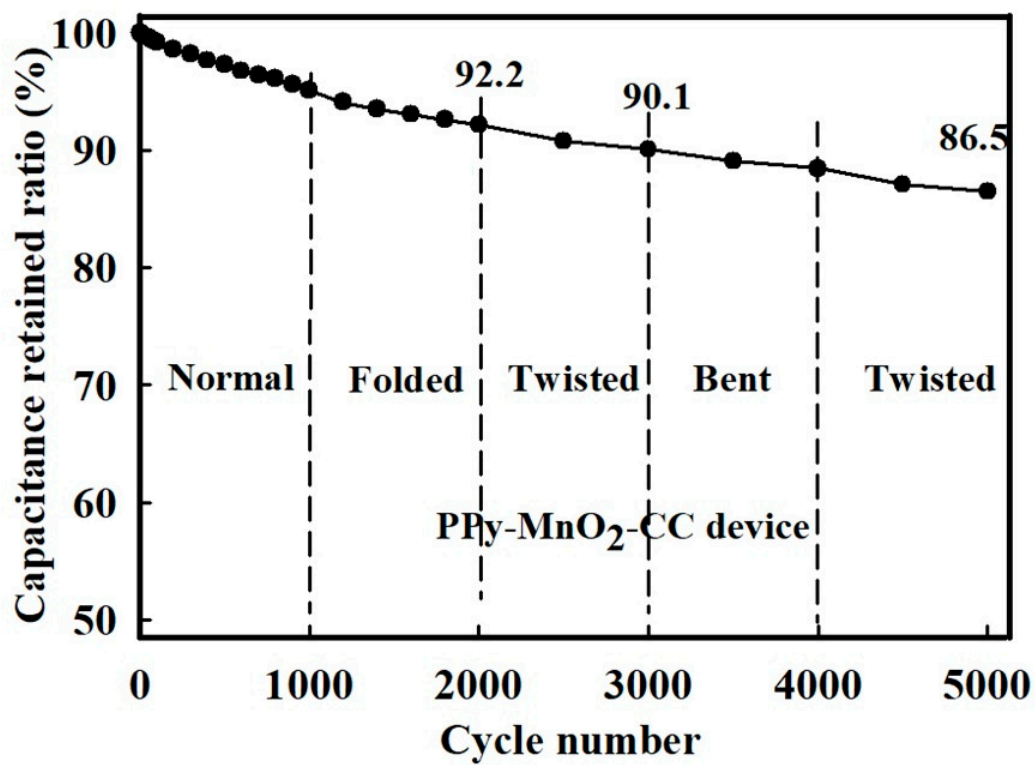

Figure S2 Cycle stability and durability of the PPy-MnO<sub>2</sub>-CC flexible SSC device under various bending and twisting test conditions by CP at 5 A/g.
